# Supplementary material for: Large cell neuroendocrine carcinoma with a solitary brain metastasis and low Ki-67: a unique subtype
Source: PubMed Central journal article supplement — Endocr Connect. 2019 Nov 14;8(12):1600–6. doi: 10.1530/EC-19-0372 (PMC6933830; doi:10.1530/ec-19-0372), 2019-11-14
Supplement: supplementary_table_1.pdf [file supplementary_table_1.pdf]

**Supplemental table 1. Type of mutation and allele frequency in 11 LCNEC patients with solitary brain metastases**

|                   | Gene  | Sample place | Allele frequency | Position | Type of mutation              | Change base                 | Change codon           |
|-------------------|-------|--------------|------------------|----------|-------------------------------|-----------------------------|------------------------|
| <b>SCLC-like</b>  |       |              |                  |          |                               |                             |                        |
| <b>A</b>          | TP53  | Lung         | 0.61             | 7577538  | Nonsynonymous SNV<br>Stopgain | C → A                       | Arg → Leu              |
|                   |       |              | 0.29             | 7574012  |                               | C → A                       | Glu → STOP             |
|                   |       | Brain        | 0.61             | 7577538  | Nonsynonymous SNV<br>Stopgain | C → A                       | Arg → Leu              |
|                   |       |              | 0.32             | 7574012  |                               | C → A                       | Glu → STOP             |
|                   | RB1   | Lung         | 0.45             | 48955517 | Stopgain                      | G → T                       | Glu → STOP             |
|                   |       |              | 0.45             | 48955517 |                               | G → T                       | Glu → STOP             |
| <b>B</b>          | RB1   | Lung         | 0.64             | 49033822 | Splice mutation               | A → C                       | Splice mutation        |
|                   |       | Brain        | 0.79             | 49033822 | Splice mutation               | A → C                       | Splice mutation        |
| <b>C</b>          | TP53  | Lung         | 0.39             | 7578257  | Stopgain                      | C → A                       | Glu → STOP             |
|                   |       | Brain        | 0.48             | 7578257  | Stopgain                      | C → A                       | Glu → STOP             |
|                   | RB1   | Lung         | 0.75             | 49033932 | Nonsynonymous SNV             | A → G                       | Asn → Ser              |
|                   |       | Brain        | 0.79             | 49033932 | Nonsynonymous SNV             | A → G                       | Asn → Ser              |
| <b>D</b>          | TP53  | Lung         | 0.72             | 7579529  | Frameshift deletion           | A → .                       | Trp → frameshift       |
|                   |       | Brain        | 0.89             | 7579529  | Frameshift deletion           | A → .                       | Trp → frameshift       |
|                   | RB1   | Lung         | 0.81             | 49047515 | Stopgain                      | G → T                       | Glu → STOP             |
|                   |       | Brain        | 0.94             | 49047515 | Stopgain                      | G → T                       | Glu → STOP             |
| <b>E</b>          | TP53  | Lung         | 0.34             | 7576928  | Splice mutation               | T → A                       | Splice mutation        |
|                   |       | Brain        | 0.62             | 7576928  | Splice mutation               | T → A                       | Splice mutation        |
| <b>F</b>          | TP53  | Lung         | 0.76             | 7578449  | Nonsynonymous SNV             | C → T                       | Ala → Thr              |
| <b>NSCLC-like</b> |       |              |                  |          |                               |                             |                        |
| <b>G</b>          | TP53  | Brain        | 0.74             | 7578188  | Nonframeshift deletion        | ATAGGGCACCCAC<br>CACACT → . | Nonframeshift deletion |
|                   | KEAP1 | Brain        | 0.80             | 10610349 | Stopgain                      | C → A                       | Glu → STOP             |

|                   |       |       |      |          |                                  |       |                 |
|-------------------|-------|-------|------|----------|----------------------------------|-------|-----------------|
|                   |       |       | 0.81 | 10610350 | Nonsynonymous SNV                | C → A | Met → Ile       |
|                   | STK11 | Brain | 0.78 | 1207120  | Stopgain                         | G → T | Glu → stop      |
| <b>H</b>          | TP53  | Brain | 0.80 | 7578457  | Nonsynonymous SNV                | C → A | Arg → Leu       |
| <b>Indefinite</b> |       |       |      |          |                                  |       |                 |
| <b>I</b>          | TP53  | Brain | 0.94 | 7578525  | Nonsynonymous SNV                | G → C | Cys → Trp       |
|                   | RB1   | Brain | 0.87 | 49039185 | Nonsynonymous SNV                | T → G | Phe → Val       |
| <b>J</b>          | KEAP1 | Lung  | 0.89 | 10602341 | Nonsynonymous SNV                | G → A | Arg → Cys       |
|                   |       | Brain | 0.95 | 10602341 | Nonsynonymous SNV                | G → A | Arg → Cys       |
| <b>K</b>          | TP53  | Lung  | 0.17 | 7577097  | Nonsynonymous SNV                | C → T | Asp → Asn       |
|                   |       | Brain | 0.55 | 7577506  | Nonsynonymous SNV<br>(different) | C → A | Asp → Tyr       |
|                   | RB1   | Brain | 0.83 | 48916851 | Splice mutation                  | G → C | Splice mutation |
|                   | KEAP1 | Lung  | 0.45 | 10597423 | Nonsynonymous SNV                | C → T | Val → Met       |
|                   |       | Brain | 0.74 | 10597423 | Nonsynonymous SNV                | C → T | Val → Met       |
|                   | STK11 | Brain | 0.79 | 1207078  | Frameshift insertion             | G → T | Gly → Trp       |

SNV = single nucleotide variant, Arg = Arginine, Leu = Leucine, Glu = Glutamic acid, N/a = not applicable, Asn = Asparagine, Ser = Serine, Trp = Tryptophan, Ala = Alanine, Thr = Threonine, Met = Methionine, Ile = Isoleucine, Cys = Cysteine, Phe = Phenylalanine, Val = Valine, Asp = Aspartic acid, Tyr = Tyrosine, Gly = Glycine.
